# Supplementary material for: Incorporating spatial heterogeneity into evapotranspiration estimates for bioretention basins
Source: Copernicus journal article supplement (doi:10.5194/egusphere-2026-22), 2026-02-18
Supplement: Supplementary file [file egusphere-2026-22-RC1-supplement.pdf]

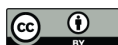

## Incorporating spatial heterogeneity into evapotranspiration estimates for bioretention basins

5 Joshua S. Caplan<sup>1\*</sup>, Martin Bouda<sup>2†</sup>, Allyson B. Salisbury<sup>1††</sup>, Michael Alonzo<sup>3</sup>, Jonathan E. Nyquist<sup>4</sup>,  
Laura Toran<sup>4</sup>, Sasha W. Eisenman<sup>1</sup>

<sup>1</sup> Department of Architecture and Environmental Design, Temple University, Ambler, PA 19002, USA

<sup>2</sup> Botanical Institute of the Czech Academy of Sciences, Průhonice, Czechia

<sup>3</sup> Department of Environmental Science, American University, Washington, DC, USA

<sup>4</sup> Department of Earth and Environmental Science, Temple University, Philadelphia, PA, USA

10

† Current address: Department of Plant Ecophysiology, University of Hohenheim, 70599 Hohenheim, Germany

†† Current address: Department of Ecology, Evolution and Natural Resources, Rutgers – the State University of New Jersey, New Brunswick, NJ, USA

*Correspondence to:* Joshua S. Caplan (jcaplan@temple.edu)

15

**Abstract.** Green stormwater infrastructure (GSI) systems like bioretention basins are frequently used in urban settings to reduce the amount of stormwater runoff entering combined sewer systems, thus protecting downstream waterbodies. Retaining stormwater in GSI allows it to infiltrate into the soil or return to the atmosphere via evapotranspiration (ET). While infiltration rates can be quantified with reasonable accuracy, methods of quantifying ET typically rely on models designed for homogeneous landcover like agricultural fields; the high spatial variation in factors including vegetation, light, and soil moisture renders estimates of ET from bioretention basins highly uncertain. To assess the influence of such variation on basin-scale ET and evaluate means of correcting for it, we quantified ET for a bioretention basin in Philadelphia, USA using three approaches: (1) an empirically-based model that incorporated direct measurements of ET and accounted for heterogeneity in plant size, light conditions, and microtopography, (2) an empirical estimate of ET based on changes in soil moisture that did not account for spatial heterogeneity, and (3) a series of conventional ET models that did not account for spatial heterogeneity. We further evaluated three methods of adjusting modeled ET estimates to better align with ours. Our empirically-based model found basin-scale daily ET to range from 0-6 mm d<sup>-1</sup>, with temporal variation dependent on weather conditions and time of year. A sensitivity analysis demonstrated that the spatial composition of plant height and shade strongly influenced basin-scale estimates. The soil moisture-based method found daily values to range from 0-4 mm d<sup>-1</sup>, which largely agreed with the empirically-based modeling estimates for the location where sensors were placed, but underpredicted estimates of basin-scale ET. Most conventional models overpredicted ET compared to our empirically-based values on average, though three were less sensitive to variation in atmospheric conditions (Granger-Grey, Hargreaves-Samani, and Matt-Shuttleworth) and thus overpredicted ET at the low to middle part of the range but underpredicted ET at the upper end of the range. This limited the ability of additive or multiplicative adjustments to improve agreement, though adjustments were highly effective for the three conventional models more sensitive to atmospheric conditions (Penman-

20  
25  
30

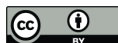

35 Monteith ASCE, Penman-Monteith FAO, and Priestly-Taylor). The strongest agreement we could achieve came from an additive adjustment to Penman-Monteith-derived values (subtracting 2.31 mm d<sup>-1</sup> from the ASCE formulation or 1.82 mm d<sup>-1</sup> from the FAO formulation). Multiplicative adjustments (i.e., landscape coefficients) and corrections accounting for shade were also effective. Our results highlight the importance of implicitly or explicitly accounting for spatial heterogeneity when  
40 accomplishing through the provided adjustments to conventional models. Additional calibration is required otherwise, but the growing availability of required data makes this increasingly viable.

## 1 Introduction

Green stormwater infrastructure (GSI) is a widely-used and rapidly expanding approach for managing stormwater in urban areas globally (McPhillips and Matsler, 2018). Bioretention basins, such as rain gardens and bioswales, are a common type  
45 of GSI that incorporate both plants and soil media. These basins perform an array of hydrological functions such as allowing stormwater to infiltrate into the subsurface or return to the atmosphere via evapotranspiration (ET); these processes reduce flooding as well as the volume of stormwater entering a municipal stormwater system. The latter helps to reduce or prevent combined sewer overflow events, thereby protecting water bodies (Kuehler et al., 2017; Skorobogatov et al., 2020). An important contrast between infiltration and ET is that infiltration occurs predominantly during and immediately following  
50 storm events, whereas ET is much slower and acts throughout the period between events (Zhang and Parolari, 2022). As a result, ET more strongly determines if a basin's soil media is able to return to baseline moisture levels before the subsequent event.

The overall importance of ET to the removal of stormwater in bioretention basins is highly variable. In their review of ET in GSI, Ebrahimiyan et al. (2019) found that studies reported ET removing 19-84% of influent stormwater, though a modeling-  
55 based analysis estimated ET below 5% (Brown and Hunt, 2011), widening the range further. Much of this variation likely arises from differences among basin configuration across studies (e.g., plant size distribution, soil media type, local environmental conditions, and the ratio of catchment to basin surface area); however, some of the variation is also inevitably methodological (Ebrahimiyan et al., 2019).

When bioretention basins are designed or evaluated (e.g., for regulatory compliance), ET is typically either disregarded or  
60 estimated using models (Traver and Ebrahimiyan, 2017). While modeling approaches are presumably less error-prone than ignoring ET altogether, conventional models were designed to inform agricultural irrigation practices and large-scale hydrologic budgets (Shuttleworth, 2007). They may therefore be inaccurate when used in urban settings with notably high heterogeneity in light, (micro)topography, and vegetation, all of which are fundamental to the energy and mass transfer equations on which ET models are based (Xue et al., 2025). Notably, standard implementations of energy-based models do  
65 not account for variation in plant size, which can be considerable at the scale of a bioretention basin. Depending on plant size



and structure, the total leaf area overlying a portion of the basin's ground surface (i.e., leaf area index; LAI) may span several orders of magnitude. Although methods exist to help circumvent this limitation, such as multiplying by a landscape coefficient ( $K_L$ ; Costello et al., 2000), they have not been evaluated in bioretention settings. A further challenge is that the most commonly-used models omit reductions in ET imposed by soil water limitation (McMahon et al., 2013), which are likely  
70 substantial in bioretention basins due to their fast-draining soil media, especially for periods between storms and in portions of basins with higher topographic positions. Solar radiation can also be variable at the basin-scale in densely urbanized environments, where buildings and other structures can cast significant shade. Given that weather and plant function drive ET, approaches that can accommodate the fine temporal scale resolution of ET may offer distinct advantages, though they often require larger quantities of input data (Ebrahimian et al., 2019; Skorobogatov et al., 2020).

75 Greater understanding of the accuracy and limitations of model-based ET estimates for use in bioretention basins would ideally come through comparison with measured or empirically-based estimates of ET. Empirical methods for quantifying ET exist but are rarely used in bioretention systems, either for research or in practice. This can be attributed to the fact that ET measurement systems require specialized equipment and can be labor intensive to operate. It is also possible to estimate ET from a water budget in which all other major fluxes are known (inflow, infiltration, and surface outflow; Li et al., 2009).  
80 However, methods such as static chambers, weighing lysimeters, and sap flow techniques are advantageous because they directly measure ET (or transpiration alone, in the case of sap flow) at fine spatial scales (Kool et al., 2014; Hamel et al. 2015). There are several examples of researchers applying these techniques to bioretention basins and other GSI (e.g., Denich and Bradford, 2010; Hess et al., 2017, Scharenbroch et al., 2016). However, few studies, if any, have examined the spatial and temporal variation of ET to evaluate the ability of conventional ET models to accurately estimate bioretention  
85 basin ET.

In this study, we applied plant physiological and geospatial techniques to a bioretention basin in Philadelphia, US to answer two primary questions: (1) how can we incorporate the heterogeneous characteristics of bioretention basins into predictions of basin ET? and (2) how can we use our empirical observations to improve the accuracy of ET models that might be used when designing and assessing bioretention basins? To address the first question, we collected ET measurements across a  
90 gradient of zones within the basin over the course of a growing season, characterized the distribution of plants, shading, and topography in the basin, and modeled ET through the growing season using the empirical data. We also assessed the sensitivity of this empirical model to several input parameters to examine the implication of excluding or oversimplifying spatial variability in bioretention ET modeling. For the second question, we compared our results to conventional ET estimation methods (e.g., Penman-Monteith) and calculated coefficients to tailor those estimates to bioretention basins.  
95 Empirically-based ET models tailored for bioretention basins can both be used by designers to better apportion credit for ET-based volume reduction and adjust design choices such as the location of larger versus smaller plants to maximize ET.



## 2 Materials and Methods

### 2.1 Study site

This study focused on a bioretention basin in Philadelphia, Pennsylvania, USA (39.96662° N, 75.13404° W). It is designated GR2 SMP A (hereafter, BASIN A) and was constructed in 2016 as part of an effort to reduce combined sewer overflows into the Delaware River. It is situated in a mixed-use neighborhood (residential and commercial) but is adjacent to an elevated portion of the Interstate 95 highway (I-95). The annual average daily traffic volume of this portion of I-95 is ~198,000 vehicles per day (PennDOT, 2021). An approximately 2695 m<sup>2</sup> portion of the roadway and shoulder drains into the basin via two inlet pipes, though some runoff also enters via a sloped structure between two segments of the highway wall (Fig. 1a). The basin is approximately linear (148 m in length and 5 m in width) and has a trapezoidal cross section (~1.5 m depth). There is a rocky gabion (44 m in length) in the center of the basin that causes the sections above and below it to function separately except during extremely large storms. For the purposes of this study, we focused on the lower portion of the basin only (Fig. 1a). During construction, urban fill was replaced with an engineered soil media with a gravelly loamy fine sand texture (as per USDA) to a depth of approximately 0.5 m. Prior to planting, the basin's flanks (i.e., sloped sides) were covered with landscape fabric. Vegetation was predominantly composed of graminoids, herbaceous perennials, and shrubs. Annual and perennial weeds were also present but were removed several times during the growing season. Most vegetation was <1 m in height but some plants were taller, including a cluster of shrubs growing along the highway wall near the inlet (~4 m; Fig. 1b). The vast majority of plants are deciduous and therefore leafless from late fall through early spring. Additional site characteristics were provided by Ampomah et al. (2023), Caplan et al. (2024), and Pope et al. (2025).

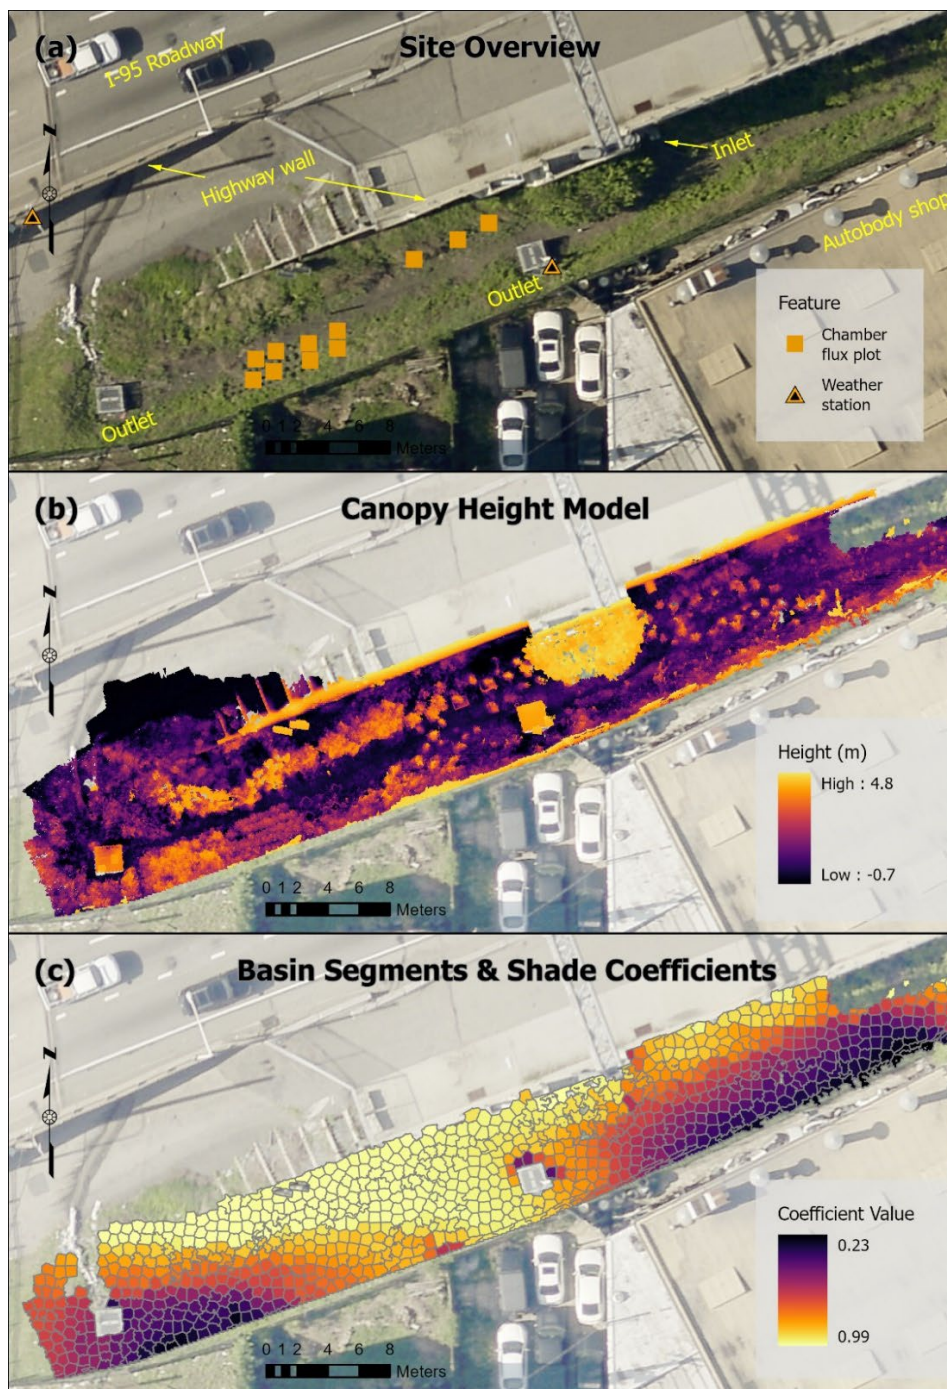

115

Figure 1. (a) Aerial view of the lower portion of BASIN A, which served as the focal site for this study. Symbols indicate where ET and weather data were measured. (b) Distribution of plant canopy heights; color scale is non-linear. (c) Distribution of shade coefficients for an example day (day of year = 180) at the segment scale. The aerial photograph was taken in 2022 by the City of Philadelphia.



## 120 2.2 Chamber flux measurements

We measured ET rates at 11 fixed locations (i.e., plots) within the lower portion of BASIN A. Eight of the plots were established such that half were at high or low topographic positions (to capture soil moisture variability within the basin), while half from each group were either in a cluster of short vegetation or in a minimally-vegetated area (Fig. 1a). Three additional plots were in an area with taller vegetation. The eight plots containing short or tall vegetation were centered on a single, dominant plant (Table 1, Fig. 1a), though small weeds were also typically present. The minimally vegetated plots contained bare ground along with small weeds.

**Table 1. Characteristics of the plots in the study basin that were used for ET measurements.**

| Vegetation Category | Primary Taxon                                                          | Number in Elevation Class |     |
|---------------------|------------------------------------------------------------------------|---------------------------|-----|
|                     |                                                                        | High                      | Low |
| Tall                | <i>Calamagrostis × acutiflora</i> 'Karl Foerster' (feather reed grass) | 0                         | 2   |
| Tall                | <i>Itea virginica</i> Little Henry® (Virginia sweetspire)              | 1                         | 0   |
| Short               | <i>Hemerocallis</i> 'Happy returns' (daylily)                          | 2                         | 2   |
| Minimal             | None                                                                   | 2                         | 2   |

130 Atmospheric conditions and soil moisture were intentionally variable across the seven measurement dates, which spanned June through October 2019. Plants were full-sized through this period, eliminating the influence of seasonal canopy size variation on our data. In particular, we targeted several dates with little antecedent rainfall and other dates following storm events. All measurement dates were rain-free to ensure intercepted rainwater evaporating from leaf surfaces would not confound ET measurements. Air temperature and humidity also varied considerably across the growing season, though we also captured variation in these parameters by taking measurements multiple times through each day (see below).

135 ET measurements were made using the static chamber approach, in which plots are covered with five-sided chambers open to the soil. Although more commonly used to measure carbon fluxes (e.g., Bansal et al., 2023; Geoghegan et al., 2018; Norman et al., 1997), the method has been successfully applied to water flux measurements as well (Garcia et al., 2008; Hamel et al., 2015; Luo et al., 2018). Custom-made collars were set into the soil at the beginning of the field season, demarcating plot boundaries (Fig. 1a). The upper faces of collars were square and approximately parallel to the basin's bottom. Plots with minimal and small-stature vegetation had collars with upper surfaces of the same dimensions (52 × 52 cm;  $n = 8$ ), while those used for larger plants were substantially greater (92 × 92 cm;  $n = 3$ ). We measured ET at each plot five to six times per day, typically between 800 and 1900 h, at approximately 90-minute intervals. For each measurement, we first attached a transparent chamber to the abovementioned collar. We then measured water vapor in the chamber once per second using an ultra-portable greenhouse gas analyzer (UGGR; Los Gatos Research, San Jose, CA, USA) that was



145 connected to the chamber using a pair of flexible tubes (4.3 m long). Calculating ET required isolating the linear portions of  
time series recorded while chambers were closed and performing linear regression to determine the rate of water vapor  
accumulation. Additional details on chamber flux measurements are provided in Supplement 1.

### 2.3 Environmental data

150 Weather data were measured at two locations (Fig. 1a). One was elevated above the highway and provided air pressure and  
total solar radiation for the entire study period at 5-minute intervals. The second was located within BASIN A and provided  
an incomplete set of temperature and relative humidity data, also at 5-min intervals. To infill missing temperature and  
relative humidity data, we obtained estimated values for BASIN A from the DarkSky weather data service  
(www.darksky.net), which uses spatial interpolation to generate hourly time series at a specified location. DarkSky values  
were interpolated to the 5-min interval using the Stineman (1980) method (via R library *imputeTS*). The resulting time series  
155 were well-correlated with the partial datasets measured in the basin itself ( $R^2_{Temp} = 0.98$ ,  $R^2_{Rh} = 0.95$ ). Finally, we used a  
dataset on volumetric soil water content from a sensor (TEROS 12, Meter Environment, Pullman, WA, USA) placed in the  
basin at 5 cm depth; it was located on the south flank of the basin, near the *Hemerocallis* plants. This dataset commenced on  
8 June and defined the onset of the period over which we subsequently estimated ET.

160 Because the air's influence on ET derives from the combined effects of air temperature and relative humidity, we computed  
vapor pressure deficit (VPD) to describe evaporative demand with a single metric. The calculation of VPD was made  
using  $VPD = VP_{sat} (1 - Rh)$ , where  $VP_{sat}$  is the saturated vapor pressure of the air (a function of its temperature; we used the  
equation provided by Wagner and Pruss, 1993) and  $Rh$  is the relative humidity.

### 2.4 Basin spatial characterization

165 We characterized the basin's topography, as well as its spatial heterogeneity in vegetation height, using a combination of  
terrestrial LiDAR and drone-based photogrammetry. First, we generated a 3D point cloud with Trimble TX5 3D terrestrial  
laser scanner (Trimble Inc., Sunnyvale, CA, USA), which was georeferenced and edited to yield a bare earth cloud model;  
this was subsequently converted to a grid (the final DEM). In addition, we generated a digital surface model (DSM) from  
drone-based photographs using structure-from-motion (methods followed Alonzo et al., 2020). Vegetation height was  
determined by subtracting the DEM from the DSM (Fig. 1b). The DEM data further enabled us to create a set of polygons  
170 demarcating topographic position within the basin; we classified areas as either "lower" (the bottom where stormwater was  
intended to flow and infiltrate) or "upper" (the basin's flanks). Additional details are provided in Supplement 1.

We characterized spatial and temporal variation in solar radiation by adjusting the empirical time series of unshaded  
irradiance (from the sensor above the highway) with correction factors that accounted for how the site was shaded by  
surrounding features. The primary tool used to generate these correction factors (which we call shade coefficients) was the  
175 Area Solar Radiation calculator in ArcMap 10.8 (ESRI, Redlands, CA, USA). This tool uses a DEM as input to quantify



solar radiation for each pixel at hourly or coarser intervals. Because we were interested in the shading effects of features such as the highway wall, nearby buildings, and a billboard, we generated a DEM from an aerial LiDAR dataset collected over the Philadelphia region in 2018 (City of Philadelphia 2018); it had a 30 cm resolution. We worked with data covering an area large enough to include all features that could potentially shade the study site ( $238 \times 167$  m). For each pixel in this DEM, the  
180 Area Solar Radiation calculator determined total direct and diffuse solar radiation for each day of the study period but did so in the absence of clouds. These were used to compute shade coefficients ( $C_{p,t}$ ) for each pixel ( $p$ ) on each day ( $t$ ) throughout the study period:

$$C_{p,t} = \frac{Direct_{p,t} + Diffuse_{p,t}}{Direct_{u,t} + Diffuse_{p,t}}, \quad (1)$$

where  $u$  indicates the pixel containing the unshaded sensor. Shade coefficients could reach as high as one if there was no  
185 shading from nearby structures but typically ranged from 0.75 to 0.95; they almost never fell below 0.3 due to diffuse radiation (Fig. 1c). The matrix of shade coefficients was multiplied by the empirical time series from the unshaded sensor to yield location-specific daily time series of solar radiation that included the shading effects of both clouds and structures surrounding the site.

In order to make the computation of ET tractable across BASIN A, we used object-oriented image analysis to aggregate  
190 predictor variables to roughly the plant scale (Blaschke, 2010). This process segmented the basin into polygons ( $n = 967$ ) with relatively homogenous vegetation height, specifically using the simple linear iterative clustering algorithm (Achanta et al., 2012; details in Supplement 1). We then aggregated pixel-scale values of the shade coefficient (Fig. 1c), topographic position, and canopy height to the segment scale using the zonal median; segment-scale values were used for all subsequent analyses.

## 195 2.5 Empirical model of ET

We developed a statistical model of ET to make it possible to estimate ET while incorporating temporal and/or spatial variation in plant height and the environmental conditions described above. The response variable was ET as measured by chamber flux; data from all 11 plots and 7 dates were included. Predictor variables included topographic position (categorical, where 0 = lower basin and 1 = upper basin) and the following continuous variables: plant height, vapor pressure  
200 deficit, solar radiation, and soil water content. Values of these variables that corresponded to the locations and times of chamber flux measurements were extracted from larger datasets for use in the statistical model. The model included two- and three-way interaction terms for the five predictor variables as well as random effects for plot identity, measurement date, and their interaction. A square-root transformation was applied to the response variable (ET) to normalize residuals. We fit coefficients (standardized to reflect effect sizes; denoted  $\beta$ ) with restricted maximum likelihood estimation via the *lme4*  
205 library (Bates et al., 2015) in R v4.4.2 (R Project for Statistical Computing, Vienna, Austria). Model fit was assessed using



marginal and conditional coefficients of determination (Nakagawa et al., 2017). In this context, marginal  $R^2$  represents variance explained only by the fixed effects while conditional  $R^2$  represents variance explained by the fixed and random effects together. Wald  $\chi^2$  tests (type II) were performed to determine which coefficients were statistically separable from zero, and we focused our interpretation on terms with relatively large effects ( $\beta > 0.1$ ) that were clearly different from zero  
 210 ( $p < 0.05$ ). However, we retained weaker terms in the model ( $\beta < 0.1$ ) since several second and third order terms were non-zero and the remaining terms had minimal influence.

We used the parameterized ET model to predict ET for each basin segment; these had unique topographic positions, plant heights, and shade coefficients but all followed the same time series of solar radiation, vapor pressure deficit, and soil volumetric water content. ET was estimated at 5-minute intervals at the segment level and then summed across all segments  
 215 and over each day to obtain daily, basin-scale ET from 8 June to 22 October ( $n = 145$  days). Night was excluded since our empirical model was parameterized only under daylight conditions; this means that values are slightly lower than they would be if ET estimates spanned 24-hr periods (likely ~5%; Groh et al., 2019).

## 2.6 Sensitivity analysis

We assessed the importance of accounting for spatial heterogeneity when determining basin-scale ET by comparing initial  
 220 model estimates to those from additional calculations that did not account for it. Specifically, we determined the sensitivity of the whole-basin empirical model to plant height, topographic position, and the shade coefficient, calculating basin-scale ET under eight scenarios in which each of those variables took on fixed values (Table 2). We then summed daily ET values across the study period for each scenario and used total ET through the 145-day focal period as the basis of comparison.

**Table 2. Variables used to test the sensitivity of the whole-basin empirical model**

| Variable             | Scenario                         | Values Used              |
|----------------------|----------------------------------|--------------------------|
| Vegetation height    | None                             | Plant height = 0 cm      |
|                      | Area-weighted mean               | Plant height = 36 cm     |
|                      | Tall                             | Plant height = 100 cm    |
| Topographic position | Low position only                | 0 in regression model    |
|                      | High position only               | 1 in regression model    |
| Shade                | 25% of incoming solar radiation  | Shade coefficient = 0.25 |
|                      | 50% of incoming solar radiation  | Shade coefficient = 0.50 |
|                      | 100% of incoming solar radiation | Shade coefficient = 1.00 |

225



## 2.7 Comparison to soil moisture-based estimates

To provide an empirical point of comparison for our ET model, we calculated ET from soil moisture time series. Data came from a triad of soil moisture sensors (TEROS 12, Meter Environment, Pullman, WA, USA) that had been installed in BASIN A as part of a separate study (Pope et al., 2025). This set did not include the sensor used to develop the empirical model, though they were all located on the same flank of the basin; these sensors were positioned at 10, 30, and 60 cm depth, but in a location on the slope where the soil surface was ~40 cm above the basin floor. For each storm event during the study period, we first identified the period of rapid decline in soil moisture corresponding to gravimetric flow draining the soil. We isolated data after these periods, namely when soil moisture was held by capillary tension and continued to decline, though at a slower rate. This phase of soil moisture loss can be attributed exclusively to ET in most cases (Bowman and King, 1965; Hess et al., 2021). To calculate ET, we assumed that volumetric water content in the top 10 cm equaled the sensor reading at 10 cm, and linearly interpolated between the other sensor depths to estimate total water content in the upper 60 cm. We then calculated the rate of ET as the net change in total water content over time, isolating the data for each day during the study period with complete data ( $n = 67$ ).

## 2.8 Comparison to conventional models

We estimated ET for the focal section of BASIN A using meteorological data applied to six commonly-used ET models (i.e., conventional models) through the R library *evapotranspiration* (Guo et al., 2016; details in Table S1). These included models describing potential ET (Priestly-Taylor [PT]), reference ET ( $ET_0$ ; Hargreaves-Samani [HS], Mott-Shuttleworth [MS]), as well as both the FAO (Food and Agriculture Organization of the United Nations) and ASCE (American Society of Civil Engineers) variants of Penman-Monteith [PM]), and “actual” ET (Granger-Gray [GG]). Using these six conventional models, we estimated ET at a daily timescale from 8 June to 22 October. Table S1 summarizes the input variables and constants used in these model runs.

Our primary model estimates used the raw time of solar radiation, with the implication that they did not include the influence of shade from nearby structures, unlike our empirical-modeling approach. We therefore additionally generated estimates using a solar radiation time series adjusted for the effect of shade from structures. This required calculating shade coefficients that could be applied to the basin as a whole for each day of the study period. To do this, we first calculated the area-weighted mean of shade coefficient values across all basin segments; this was done for each day of the study period. Then we multiplied the total solar radiation value for each day by the corresponding shade coefficient, yielding the adjusted time series.

Concordance correlation coefficients (CCC; Lin, 1989) were the primary means by which we compared ET estimates from conventional models to those from our whole-basin empirical model. CCC evaluates not only how two datasets align with



each other but how close they come to perfect agreement (i.e., a 1:1 line). Like other correlation coefficients, CCC ranges from -1 to 1, but here 1 indicates perfect concordance, 0 indicates no relationship, and -1 indicates perfect discordance.

## 2.9 Landscape coefficients

Landscape coefficients ( $K_L$ ) are used to adjust reference evapotranspiration rates ( $ET_0$ ) so they better reflect ET in ornamental or landscaped settings (Costello et al., 2000). Like crop coefficients used in agricultural settings,  $K_L$  values are multiplicative and can be considered a form of bias correction.  $K_L$  has been determined traditionally by observing the type of species, planting density, and microclimate conditions at a site and applying guidelines from Costello et al. (2000). More recently,  $K_L$  values have been determined by comparing measurements of actual ET with reference ET (Sun et al., 2012), facilitating their determination for a wide array of landscaped settings and plant combinations.

We used the latter approach, specifically by comparing our daily-scale, basin-wide empirical ET calculations ( $ET_{emp}$ ) with the ET estimates from the six conventional models described above ( $ET_{ref}$ ). Specifically, we fit the following equation using a trust-region-reflective algorithm implemented via the Matlab function *fit* (Coleman and Li, 1994; Coleman et al., 1996):

$$ET_{emp} = K_L \times ET_{ref} \quad (2)$$

where  $ET_{emp}$  and  $ET_{ref}$  were both calculated at a daily interval using weather data from 8 June to 22 October. We then multiplied  $K_L$  by  $ET_{ref}$  to generate corrected ET estimates, which we compared to  $ET_{emp}$  using the CCC.

## 2.10 Additive correction factors

We also tested additive corrections to the six conventional ET models. To determine these correction factors, we first fit a linear regression model through  $ET_{emp}$  and each set of  $ET_{ref}$  values (those generated by each of the six conventional models) and then subtracted the intercept from each  $ET_{ref}$  estimate if the intercept had a positive value. As with the landscape coefficient adjustments, we used the CCC to assess how additive corrections improved  $ET_{ref}$ .

# 3 Results & Discussion

## 3.1 Empirical ET patterns and model

On all seven measurement dates, ET followed the expected diurnal pattern: it was near-zero in the early morning, peaked in the mid-afternoon, and declined in the evening (Fig. 2). However, the amplitude of this oscillation varied considerably from day to day. It was notably muted for all plots on 27 August, when temperature and VPD were elevated and there had been little antecedent precipitation (Fig. 3). The diurnal amplitude was also muted (though to a lesser degree) on 14 October, likely due to the dry September that preceded it, as well as temperature and solar radiation declining towards the end of the season.



285 The statistical model was able to explain most of the observed variation in ET ( $R^2_{\text{marg}} = 0.65$ ;  $R^2_{\text{cond}} = 0.78$ ), with its largest standardized coefficients ( $\beta$ ) realistically encapsulating environmental and plant processes (Table S2). For one, ET increased particularly strongly with solar radiation and VPD ( $\beta = 0.393$  and  $\beta = 0.375$ , respectively). Also, ET was lower in the upper part of the basin ( $\beta = -0.158$ ), likely because flooding by stormwater runoff was infrequent. Further, the effect of VPD on ET intensified when soil media was wetter ( $\beta = 0.181$ ), reflecting how evaporative demand can more effectively drive ET when unsaturated soil contains more water. Less intuitively, the effect of solar radiation on ET weakened when soils were  
290 wetter ( $\beta = -0.089$ ), though this can be explained by reduced evaporative efficiency and/or plants limiting transpiration under (near-)saturated conditions. However, this relationship differed by topographic position ( $\beta = 0.112$ ); on basin flanks, greater moisture enhanced the ability of solar radiation to promote ET, whereas in low-lying areas, greater moisture levels dampened this response, likely due to (near-)saturation restricting water loss from plants and soil.

ET was also greater in locations where plants were taller ( $\beta = 0.093$ ), reflecting the ability of greater leaf cover per unit  
295 ground area (a.k.a. leaf area index, or LAI) raising ET (Steduto and Hsiao, 1998). The fact that this effect was not larger was likely due, at least in part, to larger plants shading the soil surface more completely, inducing a tradeoff between soil evaporation and transpiration. Another factor may have been the fact that larger plants tended to have small or no other plants around them, diminishing LAI at the plot level. Previous observations of similar leaf-level transpiration rates among the three focal species (Toran et al., 2017) suggest that differences in physiological rates had a minimal influence on plant  
300 size variation influencing ET.

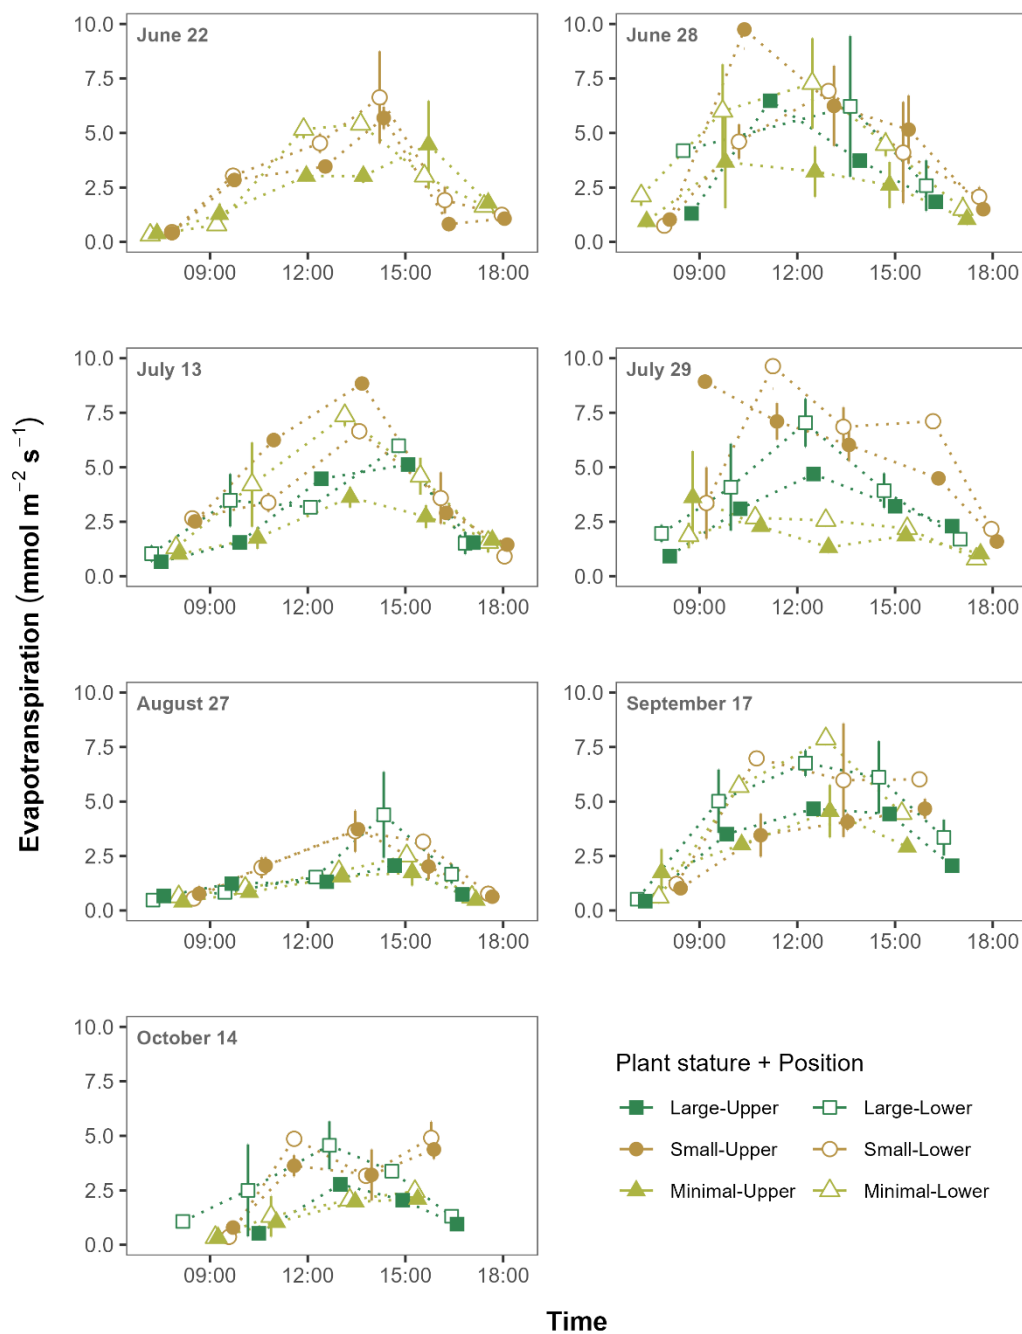

Figure 2. Plot-scale evapotranspiration rates in BASIN A measured using flux chambers. Mean rates ( $\pm$ SE) for each combination of plant stature and position are shown. Points without error bars either represent single points or their SEs are hidden by symbols.

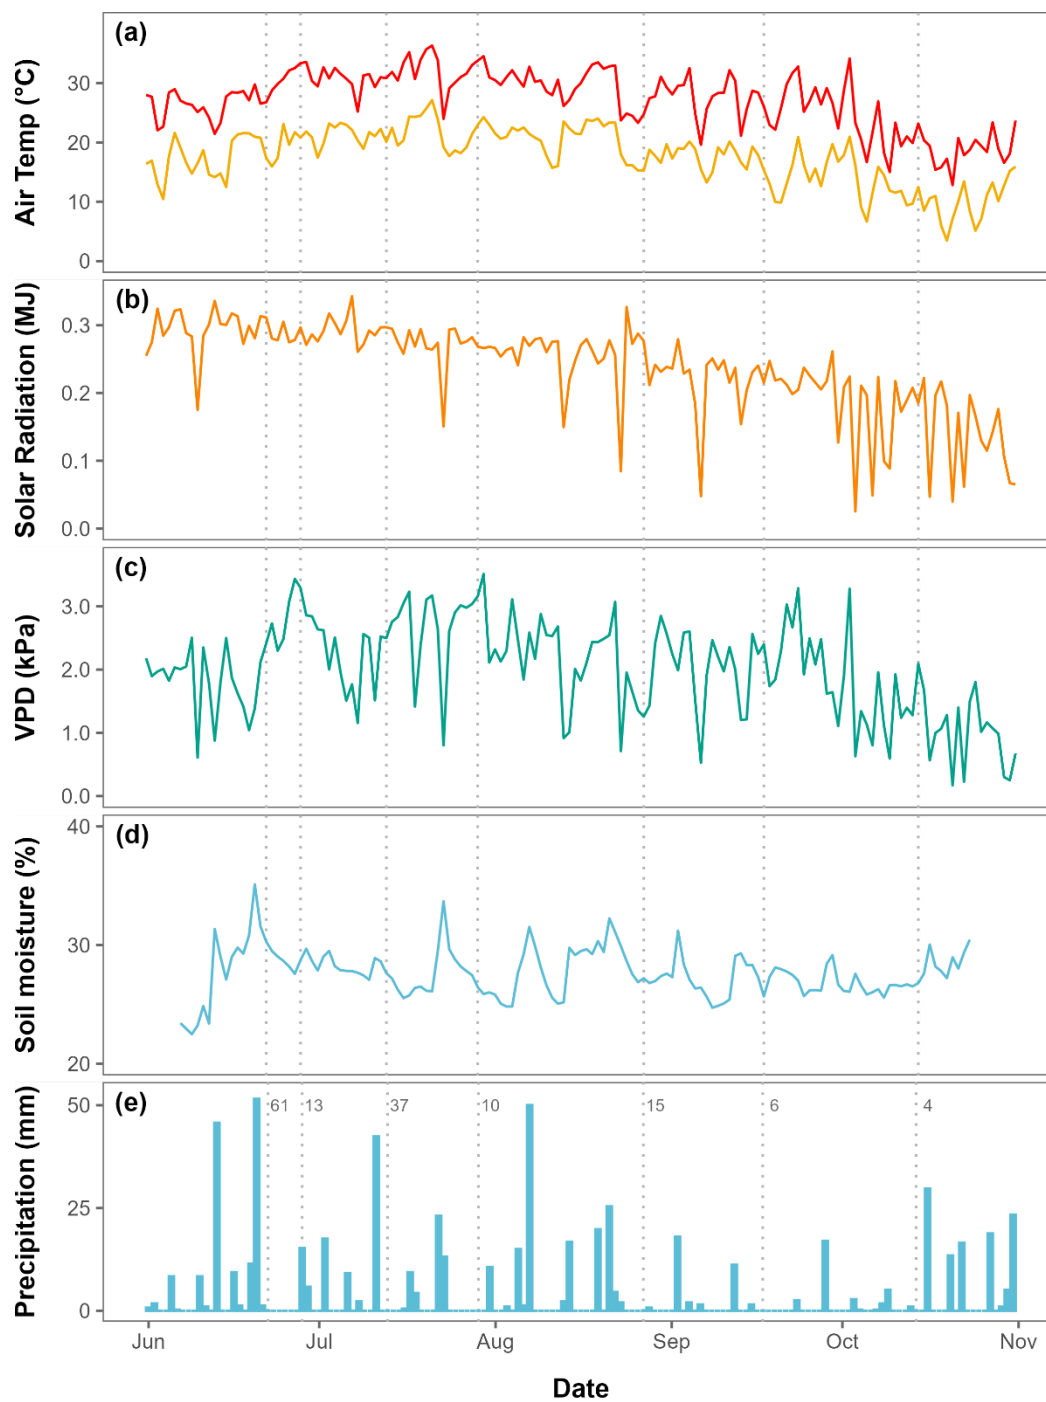

305 **Figure 3. Environmental conditions at the field site through the study period. Shown are daily maximum and minimum air temperatures, daily maximum solar radiation and vapor pressure deficit (VPD), mean soil moisture at 5 cm depth, and total precipitation. Vertical dotted lines indicate dates of ET measurements while numbers in (e) are antecedent precipitation index values (Kohler and Linsley, 1951) calculated using a 10-day window.**

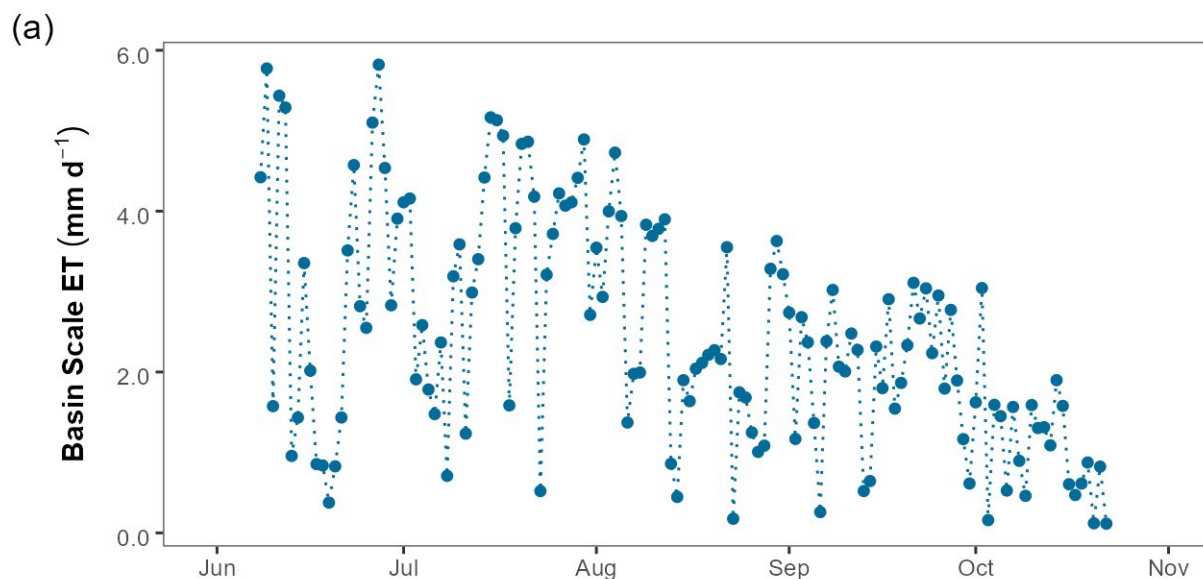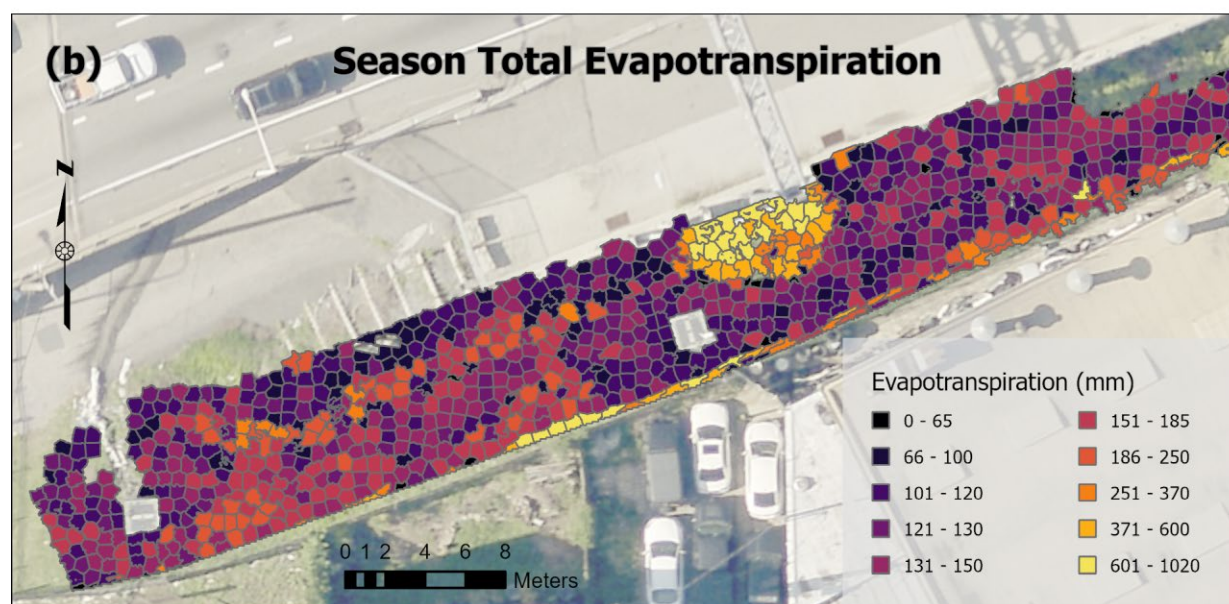

310 **Figure 4. (a) Daily ET estimated by the empirically based model for the whole basin spanning the focal period (June 8 to October 22) and (b) season-wide ET estimated by the model for each basin segment. The aerial photograph was taken in 2022 by the City of Philadelphia.**

### 3.2 Basin-scale empirical ET model

At the basin scale, peak ET exhibited the expected seasonal decline, progressing from about  $6 \text{ mm d}^{-1}$  in early- and mid-summer to around  $1 \text{ mm d}^{-1}$  by mid-autumn (Fig. 4a). However, ET was well below peak values on most days, likely due to limitations associated with weather (especially reduced solar radiation on cloudy days and reduced VPD on cool or humid

315



days). The clearest spatial pattern was that ET was elevated in areas with the tallest plants. This was most notable for a cluster of shrubs adjacent to the highway wall (Fig. 4b). However, plants in other areas were relatively tall (i.e., > 100 cm), and although they exhibited modest ET, values were smaller than expected. This was likely due to the effects of shade from two buildings and a billboard immediately to the south of the basin. Given that the highway wall was to the north of the basin, its shading effects were minimal. There was also relatively little variation in ET associated with topographic position, likely because plants tended to be shorter in the low-lying portion of the basin but taller on the flanks and surrounding areas.

### 3.3 Sensitivity analysis

Total ET through the study period, when calculated at the basin scale, was most sensitive to plant height. It fell well below the baseline (-41%) with all plant heights set to zero but rose to +60% with all plant heights set to 100 cm (Fig. 5). When we applied the area-weighted mean height to the entire basin, the season-wide estimate of ET was still reduced, at -13%. Treating all segments as having upper or lower topographic positions had little influence on seasonal ET, changing it by -3% and +0.5%, respectively (Fig. 5). In contrast, quantifying ET under the scenario that no structures shaded the basin yielded an 11% increase in season-wide ET. This decreased to -48% when we applied a shade coefficient of 0.25 (i.e., 25% of incoming solar radiation reaching the basin) and -32% with a shade coefficient of 0.5.

A study of ET in experimental bioretention cells (Nocco et al., 2016) likewise found that ET varied strongly with vegetation type, specifically with prairie plants (forbs and graminoids) > shrubs > turfgrass > bare soil. In that study, prairie plants had similar heights but a much higher density than shrubs (13.6 plants m<sup>-2</sup> vs. 1.1 plants m<sup>-2</sup>), likely meaning that LAI primarily drove the differences in ET.

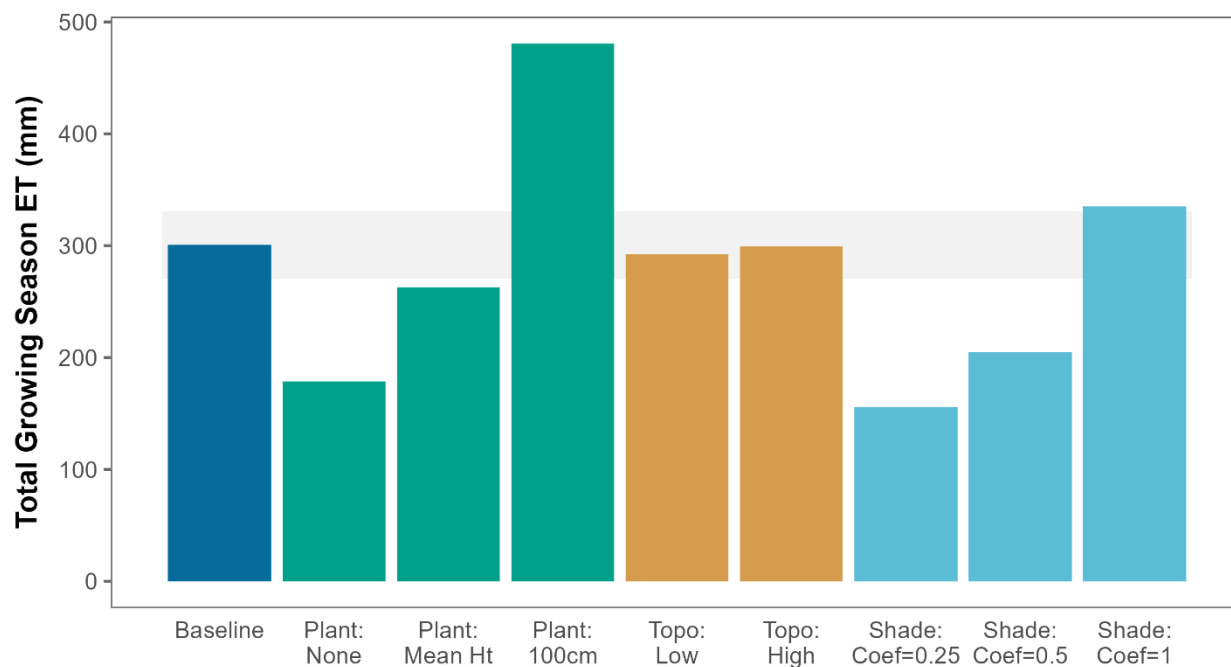

335

**Figure 5. Comparison of whole-basin empirical ET estimates for different condition scenarios. Total growing season ET was estimated from June to October 2022. The horizontal gray bar indicates  $\pm 10\%$  of the baseline model results (no change in model parameters). "None" = bare soil. "Mean Ht" = area-weighted mean plant height (36 cm). "Coef = 0.25/0.5/1" = basin receives 25%, 50%, or 100% of incoming solar radiation.**

### 340 3.4 Comparison to soil moisture-based ET estimates

Soil moisture-based ET estimates agreed moderately well with empirically-modeled ET ( $CCC = 0.63$ ; Fig. 6). Further, the two approaches yielded ET rates that spanned a similar and reasonable range, suggesting that the empirical model produced reasonable estimates of ET. Nonetheless, when ET exceeded  $2 \text{ mm d}^{-1}$ , soil moisture-based ET often yielded lower ET rates than the empirical model. Although the soil moisture-based method has been validated using weighing lysimeters set up to mimic stormwater cells (Hess et al., 2021), it is not possible to definitively determine which approach more accurately reflected true, basin-scale ET. However, given that the soil moisture sensors used here were installed on the flank of the basin rather than the bottom, the soil moisture-based approach could be expected to underestimate basin-scale ET. This would be consistent with the empirical modeling approach presented here yielding more accurate basin-scale values. Given that the soil moisture-based approach can be influenced by the placement of the soil moisture sensors, especially in basins with high spatial heterogeneity, combining data from multiple sets of sensors would likely improve its accuracy considerably.

350

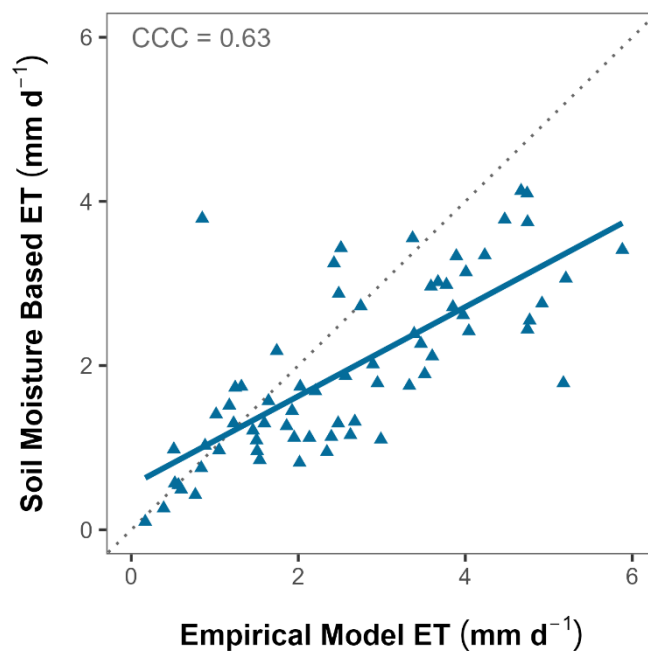

**Figure 6. Daily ET calculated from our basin-scale, empirically-based model vs. calculations based on soil moisture loss. The dotted line depicts a 1:1 relationship. CCC = concordance correlation coefficient.**

### 355 3.5 Comparison to conventional ET models

In the absence of correction factors, there was moderately strong agreement between the basin-scale values generated by our empirical model and those from conventional ET models. The MS and GG models had the highest agreement ( $CCC_{orig} = 0.80$  and  $0.78$ , respectively; Fig. 7); however, both overestimated lower ET rates and underestimated higher ET rates. Further, the PM-ASCE, PM-FAO, and PT models consistently overestimated ET relative to our empirical model, leading to an offset that lowered CCC values ( $CCC_{orig} = 0.41$ ,  $0.57$ , and  $0.60$ , respectively; Fig. 7). The HS model also overestimated ET and had the poorest agreement of the six models ( $CCC_{orig} = 0.30$ ), although it produced estimates close to those from the empirical model for ET rates above  $4 \text{ mm d}^{-1}$ .

Application of the shade coefficient to the input solar radiation data yielded improved agreement when using the PM-ASCE, PM-FAO, and PT models ( $CCC_{shade} = 0.44$ ,  $0.63$ , and  $0.68$ , respectively) but made a negligible difference when using the other models (Fig. S1). This improvement was smaller than initially expected, likely because BASIN A was oriented east-west, with the highway wall to the north, meaning the sun was less often shaded by the wall than it would be at many other sites. Given that the data needed to generate shade coefficients are frequently available (i.e., high-resolution DEM, software to model direct and diffuse radiation, and a solar radiation sensor in an unshaded location), we recommend that shade

coefficients be determined and used in ET modeling whenever possible, especially for basins subject to shading from tall  
370 structures.

HS, PM-FAO, and PM-ASCE all assume that crops have unlimited access to water (McMahon et al., 2013), which was not  
the case at our site (Fig. 3), and likely occurs only for limited periods (e.g., for a few days following storms) in urban  
bioretention basins more broadly. These models' assumptions about water availability may therefore have contributed to  
their ET values being elevated over those from the empirical model. In contrast, the MS equation was developed for arid and  
375 semi-arid climates, and the GG model explicitly assumes non-saturated soil (McMahon et al., 2013), which may explain why  
they underestimated relatively high ET rates. Additionally, the mean vegetation height in BASIN A was 36 cm, yet the PM-  
FAO, which assumes a 12 cm plant height, had better agreement than the PM-ASCE, which assumes a 50 cm plant height.  
Most likely, the PM-FAO model's shorter plant height approximately compensated for the effects of water limitation, rather  
than accounting for basin conditions more accurately.

380 Other researchers have similarly observed variability in the prediction capabilities of conventional ET models applied to  
bioretention basins. For example, PM-ASCE closely tracked measured ET in a mesocosm with unrestricted drainage but  
underestimated ET for a mesocosm with an internal water storage device (Hess et al., 2017). The PT model consistently  
underestimated ET in a bioretention mesocosm with mixed, short-stature vegetation (Wadzuk et al., 2016) and prairie plants  
(Nocco et al. 2016), whereas it was fairly accurate for experimental basins planted with shrubs or turfgrass (Nocco et al.,  
385 2016). Based on a review of these and other studies, Ebrahimian et al. (2019) recommend using the HS equation, arguing  
that, while it typically overestimates bioretention ET, this is outweighed by the fact that it only requires temperature and  
location data as inputs. Given that HS had the lowest CCC among the six models we evaluated, we recommend using other  
models if the required data are available, but we acknowledge that HS may be the only realistic option if they are not.

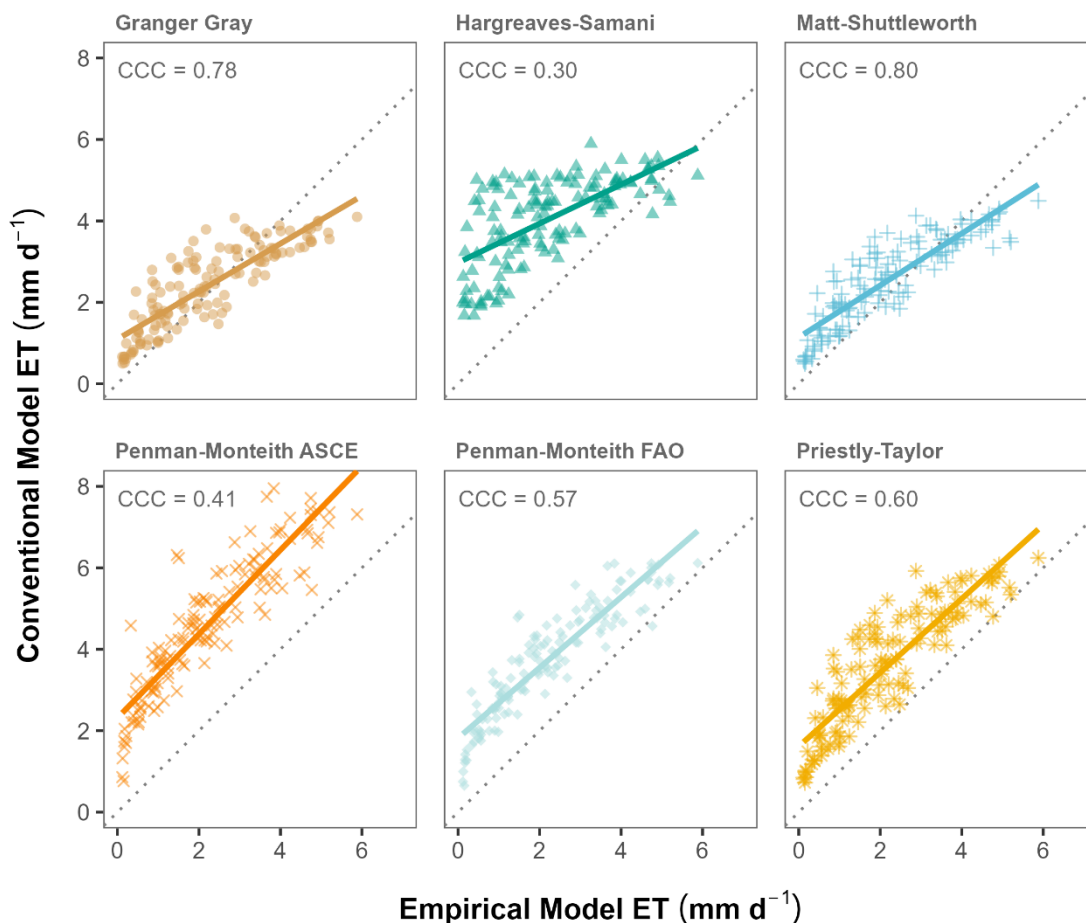

390 **Figure 7. Daily ET calculated from our basin-scale, empirically-based model vs. ET from six conventional models. Dotted lines**  
**depict 1:1 relationships. CCC = concordance correlation coefficient.**

### 3.6 Estimation using landscape coefficients

The landscape coefficients ( $K_L$ ) we calculated (approximately 0.5 to 1.0) were in the range of  $K_L$  values previously  
determined for park-like landscapes with mixtures of plant types (Sun et al., 2012; Pannkuk et al., 2010; Nouri et al.,  
395 2013). Applying these  $K_L$  values to the ET estimates from the majority of conventional models (PM-ASCE, PM-FAO, PT,  
and HS) improved agreement with those from our empirically-based approach (Table 3; Fig. S2). A mathematical byproduct  
of applying multiplicative corrections when initial estimates were greater than ours is that it made conventional models less  
responsive to changing environmental conditions.

The  $K_L$  correction yielded the greatest improvement in agreement for HS estimations ( $CCC_{KL} = 0.43$ ), though this model far  
400 underperformed all other models even with the correction. MS and GG stood out in having relatively large  $K_L$  (>0.90),



meaning corrections were smaller than for other models. The PM-ASCE-based  $K_L$  ( $0.52 \pm 0.03$ ) was slightly lower than the PM-FAO-based  $K_L$  ( $0.64 \pm 0.03$ ) (Table 3), corresponding to the greater plant height assumed by PM-ASCE (50 cm) vs. PM-FAO (12 cm).

405 The  $K_L$  approach to ET estimation is useful because it can be tailored to specific environments and conditions (e.g., Nouri et al., 2013).  $K_L$  values can be adjusted through the growing season to reflect shifts in plant size and the associated changes in the actual ET vs.  $ET_0$  relationship through time (Pannkuk et al., 2010). However, the method can be difficult to apply to larger woody vegetation since the relationship between  $ET_0$  and actual ET can be non-linear (Litvak et al., 2017). Nonetheless, our results indicate that  $K_L$ -based adjustments can provide reasonable estimates of actual ET in bioretention basins when used in basins with small- to medium-stature woody vegetation, especially when used with  $ET_0$  estimates that  
410 have linear relationships with actual ET (e.g., PM-ASCE and PM-FAO).



415

**Table 3. Landscape coefficients ( $K_L$ ), 95% confidence intervals (CI), and concordance correlation coefficients (CCC) for the six conventional ET models. CCC were calculated in comparison to the whole-basin empirical model. Original = no adjustment to conventional model. Shade = model included shade coefficient adjusted solar radiation.  $K_L$  = model correction based on landscape coefficient. Additive = model correction based on linear regression intercept. Numbers in bold highlight the highest concordance correlation coefficient for each model.**

| Model                          | CCC <sub>orig</sub> | CCC <sub>shade</sub> | CCC <sub><math>K_L</math></sub> | CCC <sub>add</sub> | $K_L$ | $K_L$ 95% CI | Additive Correction | Additive 95% CI |
|--------------------------------|---------------------|----------------------|---------------------------------|--------------------|-------|--------------|---------------------|-----------------|
| Granger-Gray [GG]              | <b>0.78</b>         | 0.77                 | <b>0.78</b>                     | 0.62               | 0.97  | 0.91-1.02    | 1.10                | 0.9-1.3         |
| Hargreaves-Samani [HS]         | 0.3                 | 0.3                  | <b>0.46</b>                     | 0.44               | 0.57  | 0.52-0.62    | 2.98                | 2.7-3.2         |
| Matt-Shuttleworth [MS]         | <b>0.8</b>          | <b>0.8</b>           | <b>0.8</b>                      | 0.69               | 0.91  | 0.87-0.96    | 1.14                | 1.0-1.3         |
| Penman-Monteith ASCE [PM-ASCE] | 0.41                | 0.44                 | 0.78                            | <b>0.89</b>        | 0.52  | 0.49-0.54    | 2.31                | 2.1-2.5         |
| Penman-Monteith FAO [PM-FAO]   | 0.57                | 0.63                 | 0.8                             | <b>0.89</b>        | 0.64  | 0.60-0.67    | 1.82                | 1.6-2.0         |
| Priestly-Taylor [PT]           | 0.6                 | 0.68                 | 0.81                            | <b>0.88</b>        | 0.65  | 0.61-0.68    | 1.61                | 1.4-1.8         |

### 3.7 Estimation using additive correction factors

Applying an additive correction factor substantially increased CCCs for three of the conventional models (PM-ASCE, PM-FAO, and PT), indicating that their corrected estimates ( $CCC_{add} = 0.89, 0.89,$  and  $0.88,$  respectively; Fig. S3, Table 3) more closely matched our empirically-derived ET values than did the uncorrected estimates. Additive corrections were more effective than landscape coefficients since these three models consistently overpredicted ET relative to our empirical approach. Nonetheless, for these three models, additive correction produced the best agreement made with conventional ET models, adjusted or not.

In contrast, additive corrections yielded poorer agreement with our estimates for the MS and GG models ( $CCC_{add} = 0.69$  and  $0.62,$  respectively). In fact, none of the correction methods we tried improved agreement for either of these models with the empirically-derived values. This may be because there was already relatively good agreement ( $CCC \approx 0.8$ ), potentially due to the fact that MS and GG incorporate soil moisture limitation. MS does so implicitly, since it is essentially a variant of the PM model tailored for (semi-)arid climates (Shuttleworth and Wallace 2009). GG explicitly accounts for unsaturated soil conditions by including a coefficient for surface resistance into its estimation of ET (Granger and Gray, 1989).



### 430 3.8 Implications for bioretention design

The findings of this study have several implications for ET quantification and plant placement during the basin design process. Most importantly, several conventional ET models have the potential to accurately estimate ET in bioretention basins, despite their highly variable environments. For those with similar designs and in similar contexts to BASIN A, the PM-ASCE, PM-FAO, or PT models could be used along with the correction factors we derived for BASIN A. However, 435 calibration to local conditions would be necessary for generating accurate ET estimates when the assumption of similarity cannot be made. Specifically, more appropriate  $K_L$  values could be determined through a measurement campaign (whether using an approach similar to ours or otherwise), or they could be estimated following the procedure outlined by Costello et al. (2000). Future research on basins in a broad range of settings could further illuminate the wider applicability of such corrections.

440 The HS model produced comparatively poor predictions for our basin. This model requires the least amount of climate input data since it estimates solar radiation based on latitude and time of year and makes assumptions about other meteorological variables (Guo et al. 2016). Considering the increasing availability of weather and solar radiation data, the simplifications of the HS model may become increasingly unnecessary. Instead, designers may be able to capitalize on other, more accurate models.

445 Additionally, our method of computing shade coefficients may be a simple yet useful means of adjusting solar radiation time series to increase the accuracy of ET estimates from conventional models, especially for sites with substantial shade from nearby infrastructure. The only requirements beyond a solar radiation time series are a high-resolution DEM of the site and software to compute direct and diffuse solar radiation from the DEM (such as ArcGIS).

Finally, engineers and landscape architects designing bioretention basins can potentially raise ET by placing plants that will 450 grow larger (or otherwise produce greater leaf area) in appropriate locations within the basin. This might include basin flanks that receive little shade; locations that are frequently flooded may or may not be appropriate depending on the duration of soil saturation and soil salinity levels (Muerdter et al, 2018; Caplan et al., 2024). Larger plants may have utility in bioretention basins with internal water storage capacity (Hess et al., 2017). A potential tradeoff of increasing the size and extent of plants in a bioretention basin is the need to ensure access to adequate soil moisture through dry periods, especially 455 since soil media is typically coarse-textured and can dry out substantially between rain events (Houdeshel et al., 2012; Nocco et al. 2016). This is a particular challenge in drier climates (Orr, 2013). We note that plants with deeper root systems (including large shrubs and trees) can access water over a broader depth range, lessening this limitation (Caplan et al. 2019).

### 3.9 Study Limitations

Our empirical data came from a single bioretention basin, limiting the generalizability of our statistical model and basin- 460 scale ET estimates. Nonetheless, the conclusions are likely applicable to other sites given that BASIN A contains many design



features common in bioretention basins. These include the structure (a central flow path flanked by sloped sides), partial shading from surrounding structures, taxa common in GSI in the Mid-Atlantic region (Myers et al., *in revision*), and sandy loam soils.

465 Second, ET estimates for the largest plants in the basin required extrapolation from measurements from only modestly large plants, since our flux chambers were ~100 cm tall. Although plants taller than the chambers covered only ~10% of the basin area, they did have a disproportionally-large influence on basin-scale ET rates. The negative interaction effects in our statistical model between plant height and both volumetric water content and solar radiation, while marginally significant, meant that plant size influenced ET less than a strictly linear relationship would. Still, the accuracy of extrapolated ET values is, by definition, unknown.

470 Finally, we could not calculate ET's contribution to stormwater volume reduction since we lack data on inflow into BASIN A. Empirical measurement was attempted but unsuccessful. Direct measurement did not capture low flows and approximating it using precipitation records in combination with directly-connected impervious area (DCIA) was highly unreliable because DCIA appeared to change through time depending on highway construction activities and other factors.

## 4 Conclusions

475 Bioretention basins and other types of green stormwater infrastructure play an important role in offsetting the negative hydrologic impacts of impervious surfaces. To design these systems optimally, we need methods of accurately quantifying a basin's ability to reduce stormwater volume not only through infiltration but also through evapotranspiration (ET). However, ET involves multiple soil, plant, and meteorological processes, all of which are highly variable in space and time, and some of which are challenging to measure directly.

480 We parameterized a spatially-explicit ET model for a bioretention basin based on measurements of water flux from soil and plants, plant size, soil moisture, weather, and shade cast by nearby buildings and other tall structures. This empirical whole-basin model matched our ET measurements reasonably well ( $R^2_{\text{marg}} = 0.65$ ;  $R^2_{\text{cond}} = 0.78$ ). The model was particularly sensitive to plant height and shade, both of which should be carefully measured or estimated when modeling bioretention basin ET. They are also factors that designers can influence, meaning that ET can likewise be moderated through design.

485 Quantifying ET at fine spatial scales is typically unnecessary for bioretention basin design or system evaluation. While instructive for elucidating sources of ET variation within a basin, directly measuring ET within bioretention basins is a laborious process requiring specialized equipment not commonly part of stormwater practitioner's toolkits. Penman-Monteith ASCE and FAO and Priestly-Taylor models produced estimates that consistently over estimated ET in comparison to our empirical model. These model results could be used as is, with the understanding that they are overestimates, or they  
490 can be modified with an additive coefficient to produce closer agreement with ET rates. Matt-Shuttleworth and Granger-



Gray also had good agreement with our empirical model, though they tended to underpredict high ET rates and overpredict low ET. The Hargreaves-Samani model had the worst agreement regardless of correction factors used, likely because it only requires temperature data and estimates solar radiation based on location rather than measurements. When sufficient temperature, wind, and solar radiation data are available, we feel the Penman-Monteith and Priestly-Taylor equations provide reasonable estimates of ET in sites such as the I-95 bioretention basin.

### Data and code availability

All of the code and data needed to reproduce the results of this study are available from HydroShare: <http://www.hydroshare.org/resource/ba487d9c6e4b473f88d8298499ee1c6d>

### Author contributions

JSC: conceptualization, methodology, formal analysis, investigation, data curation, writing - original draft, writing - review & editing, visualization, supervision, project administration. MB: conceptualization, formal analysis, writing - review & editing. AS: data curation, writing - original draft, writing - review & editing, visualization. MGA: conceptualization, formal analysis, writing - review & editing. JEN: methodology, investigation, resources, writing - review & editing. LT: conceptualization, project writing - review & editing, administration, funding acquisition. SWE: conceptualization, methodology, supervision, funding acquisition.

### Competing interests

The authors declare that they have no conflict of interest.

### Acknowledgements

We are grateful to Anastasia Rozovski for contributions to data cleaning and analysis, Andrew Kurzweil and the Villanova Center for Resilient Water Systems for sharing microclimate data, Sam Chatten for assistance with field data collection, Thomas Mozdzer for loaning his gas analyzer, Marilyn Can for assistance with the shade analysis, and Ro Klinger for assistance with map generation.

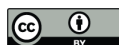

## Financial support

This research was funded by the Pennsylvania Department of Transportation under the SR 0095 Section GIR project through  
515 a subcontract from AECOM.

## References

- Achanta, R., Shaji, A., Smith, K., Lucchi, A., Fua, P., and Süssstrunk, S.: SLIC superpixels compared to state-of-the-art superpixel methods, *IEEE Trans. Pattern Anal. Mach. Intell.*, 34, 2274–2282, <https://doi.org/10.1109/TPAMI.2012.120>, 2012.
- 520 Alonzo, M., Dial, R. J., Schulz, B. K., Andersen, H.-E., Lewis-Clark, E., Cook, B. D., and Morton, D. C.: Mapping tall shrub biomass in Alaska at landscape scale using structure-from-motion photogrammetry and lidar, *Remote Sens. Environ.*, 245, 111841, <https://doi.org/10.1016/j.rse.2020.111841>, 2020.
- Ampomah, R., Holt, D., Smith, C., Smith, V., Sample-Lord, K., Nyquist, J.: Modeling bioinfiltration surface dynamics through a hybrid geomorphic-infiltration model. *Blue-Green Sys.*, 5, 152–168. <https://doi.org/10.2166/bgs.2023.027>,  
525 2023.
- Bansal, S., Creed, I. F., Tangen, B. A., et al.: Practical guide to measuring wetland carbon pools and fluxes, *Wetlands*, 43, 105, <https://doi.org/10.1007/s13157-023-01722-2>, 2023.
- Bates, D., Mächler, M., Bolker, B., and Walker, S.: Fitting linear mixed-effects models using lme4, *J. Stat. Softw.*, 67, 1–48, <https://doi.org/10.18637/jss.v067.i01>, 2015.
- 530 Blaschke, T.: Object based image analysis for remote sensing, *ISPRS J. Photogramm. Remote Sens.*, 65, 2–16, <https://doi.org/10.1016/j.isprsjprs.2009.06.004>, 2010.
- Bowman, D. H. and King, K. M.: Determination of evapotranspiration using the neutron scattering method, *Can. J. Soil Sci.*, 45, 117–126, 1965.
- 535 Brown, R. A. and Hunt, W. F.: Impacts of media depth on effluent water quality and hydrologic performance of undersized bioretention cells, *J. Irrig. Drain. Eng.*, 137, 132–143, [https://doi.org/10.1061/\(ASCE\)IR.1943-4774.0000167](https://doi.org/10.1061/(ASCE)IR.1943-4774.0000167), 2011.
- Caplan, J. S., Galanti, R. C., Olshevski, S., and Eisenman, S. W.: Water relations of street trees in green infrastructure tree trench systems, *Urban For. Urban Green.*, 41, 170–178, <https://doi.org/10.1016/j.ufug.2019.03.016>, 2019.
- 540 Caplan, J. S., Salisbury, A. B., McKenzie, E. R., Behbahani, A., and Eisenman, S. W.: Spatial, temporal, and biological factors influencing plant responses to deicing salt in roadside bioinfiltration basins, *J. Environ. Manage.*, 359, 120761, <https://doi.org/10.1016/j.jenvman.2024.120761>, 2024.



- City of Philadelphia: Philadelphia LiDAR – LAS files 2018, Pennsylvania Spatial Data Access, available at:  
<https://www.pasda.psu.edu/uci/DataSummary.aspx?dataset=2021>, 2018.
- Coleman, T. F. and Li, Y.: On the convergence of interior-reflective Newton methods for nonlinear minimization subject to bounds, *Math. Program.*, 67, 189–224, <https://doi.org/10.1007/BF01582221>, 1994.
- 545 Coleman, T. F. and Li, Y.: An interior trust region approach for nonlinear minimization subject to bounds, *SIAM J. Optim.*, 6, 418–445, <https://doi.org/10.1137/0806023>, 1996.
- Costello, L. R., Matheny, N. P., and Clark, J. R.: A guide to estimating irrigation water needs of landscape plantings in California: the landscape coefficient method and WUCOLS III, *California Dep. Water Resour.*, available at:  
<https://cimis.water.ca.gov/Content/PDF/wucols00.pdf>, 2000.
- 550 Denich, C., Bradford, A., and Drake, J.: Bioretention: assessing effects of winter salt and aggregate application on plant health, media clogging and effluent quality, *Water Qual. Res. J.*, 48, 387–399, <https://doi.org/10.2166/wqrjc.2013.065>, 2013.
- Ebrahimian, A., Wadzuk, B., and Traver, R.: Evapotranspiration in green stormwater infrastructure systems, *Sci. Total Environ.*, 688, 797–810, <https://doi.org/10.1016/j.scitotenv.2019.06.256>, 2019.
- 555 Garcia, A., Johnson, M. J., Andraski, B. J., Halford, K. J., and Myers, C. J.: Portable chamber measurements of evapotranspiration at the Amargosa Desert Research Site near Beatty, Nevada, 2003–06, *USGS Sci. Investig. Rep.* 2008–5135, Reston, VA, 2008.
- Geoghegan, E. K., Caplan, J. S., Leech, F. N., Weber, P. E., Bauer, C. E., and Mozdzer, T. J.: Nitrogen enrichment alters carbon fluxes in a New England salt marsh, *Ecosyst. Health Sustain.*, 4, 277–287,  
560 <https://doi.org/10.1080/20964129.2018.1532772>, 2018.
- Granger, R. J. and Gray, D. M.: Evaporation from natural nonsaturated surfaces, *J. Hydrol.*, 111, 21–29,  
[https://doi.org/10.1016/0022-1694\(89\)90249-7](https://doi.org/10.1016/0022-1694(89)90249-7), 1989.
- Groh, J., Pütz, T., Gerke, H. H., Vanderborght, J., and Vereecken, H.: Quantification and prediction of nighttime evapotranspiration for two distinct grassland ecosystems, *Water Resour. Res.*, 55, 2961–2975,  
565 <https://doi.org/10.1029/2018WR024072>, 2019.
- Guo, D., Westra, S., and Maier, H. R.: An R package for modelling actual, potential and reference evapotranspiration, *Environ. Model. Softw.*, 78, 216–224, <https://doi.org/10.1016/j.envsoft.2015.12.019>, 2016.
- Hamel, P., McHugh, I., Coutts, A., Daly, E., Beringer, J., and Fletcher, T. D.: Automated chamber system to measure field evapotranspiration rates, *J. Hydrol. Eng.*, 20, 04014037, [https://doi.org/10.1061/\(ASCE\)HE.1943-5584.0001006](https://doi.org/10.1061/(ASCE)HE.1943-5584.0001006), 2015.



- 570 Hess, A., Wadzuk, B. M., and Welker, A. L.: Evapotranspiration in rain gardens using weighing lysimeters, *J. Irrig. Drain. Eng.*, 143, 04017004, [https://doi.org/10.1061/\(ASCE\)IR.1943-4774.0001157](https://doi.org/10.1061/(ASCE)IR.1943-4774.0001157), 2017.
- Hess, A., Wadzuk, B., and Welker, A.: Evapotranspiration estimation in rain gardens using soil moisture sensors, *Vadose Zone J.*, 20, e20100, <https://doi.org/10.1002/vzj2.20100>, 2021.
- Houdeshel, C. D., Pomeroy, C. A., and Hultine, K. R.: Bioretention design for xeric climates based on ecological principles, 575 *J. Am. Water Resour. Assoc.*, 48, 1178–1190, <https://doi.org/10.1111/j.1752-1688.2012.00678.x>, 2012.
- Kool, D., Agam, N., Lazarovitch, N., Heitman, J. L., Sauer, T. J., and Ben-Gal, A.: A review of approaches for evapotranspiration partitioning, *Agric. For. Meteorol.*, 184, 56–70, <https://doi.org/10.1016/j.agrformet.2013.09.003>, 2014.
- Kohler, M. A. and Linsley, R. K.: Predicting the runoff from storm rainfall, U.S. Weather Bureau Research Paper No. 34, 41 580 pp., 1951.
- Kuehler, E., Hathaway, J., and Tirpak, A.: Quantifying the benefits of urban forest systems as a component of the green infrastructure stormwater treatment network, *Ecohydrology*, 10, e1813, <https://doi.org/10.1002/eco.1813>, 2017.
- Li, H., Sharkey, L. J., Hunt, W. F., and Davis, A. P.: Mitigation of impervious surface hydrology using bioretention in North Carolina and Maryland, *J. Hydrol. Eng.*, 14, 407–415, [https://doi.org/10.1061/\(ASCE\)1084-0699\(2009\)14:4\(407\)](https://doi.org/10.1061/(ASCE)1084-0699(2009)14:4(407)), 2009.
- 585 Lin, L. I.-K.: A concordance correlation coefficient to evaluate reproducibility, *Biometrics*, 45, 255–268, <https://doi.org/10.2307/2532051>, 1989.
- Litvak, E., McCarthy, H. R., and Pataki, D. E.: A method for estimating transpiration of irrigated urban trees in California, *Landsc. Urban Plan.*, 158, 48–61, <https://doi.org/10.1016/j.landurbplan.2016.09.021>, 2017.
- Luo, C., Wang, Z., Sauer, T. J., Helmers, M. J., and Horton, R.: Portable canopy chamber measurements of 590 evapotranspiration in corn, soybean, and reconstructed prairie, *Agric. Water Manag.*, 198, 1–9, <https://doi.org/10.1016/j.agwat.2017.11.024>, 2018.
- McMahon, T. A., Peel, M. C., Lowe, L., Srikanthan, R., and McVicar, T. R.: Estimating actual, potential, reference crop and pan evaporation using standard meteorological data: a pragmatic synthesis, *Hydrol. Earth Syst. Sci.*, 17, 1331–1363, <https://doi.org/10.5194/hess-17-1331-2013>, 2013.
- 595 McPhillips, L. E. and Matsler, A. M.: Temporal evolution of green stormwater infrastructure strategies in three US cities, *Front. Built Environ.*, 4, 26, <https://doi.org/10.3389/fbuil.2018.00026>, 2018.



- Muerdter, C. P., Wong, C. K., and LeFevre, G. H.: Emerging investigator series: The role of vegetation in bioretention for stormwater treatment in the built environment: pollutant removal, hydrologic function, and ancillary benefits, *Environ. Sci.: Water Res. Technol.*, 4, 592–612, <https://doi.org/10.1039/C7EW00511C>, 2018.
- 600 Myers, D., Wadzuk, B., Hess, A., and Caplan, J. S.: A data compilation to support bioretention plant choices in the U.S. Mid-Atlantic and Midwest region, *J. Sustain. Water Built Environ.*, in revision.
- Nakagawa, S., Johnson, P. C. D., and Schielzeth, H.: The coefficient of determination  $R^2$  and intra-class correlation coefficient from generalized linear mixed-effects models revisited and expanded, *J. R. Soc. Interface*, 14, 20170213, <https://doi.org/10.1098/rsif.2017.0213>, 2017.
- 605 Nocco, M. A., Rouse, S. E., and Balster, N. J.: Vegetation type alters water and nitrogen budgets in a controlled, replicated experiment on residential-sized rain gardens planted with prairie, shrub, and turfgrass, *Urban Ecosyst.*, 19, 1665–1691, <https://doi.org/10.1007/s11252-016-0568-7>, 2016.
- Norman, J. M., Kucharik, C. J., Gower, S. T., Baldocchi, D. D., Crill, P. M., Rayment, M., Savage, K., and Striegl, R. G.: A comparison of six methods for measuring soil-surface carbon dioxide fluxes, *J. Geophys. Res.*, 102, 28771–28777, 610 <https://doi.org/10.1029/97JD01440>, 1997.
- Nouri, H., Beecham, S., Hassanli, A. M., and Kazemi, F.: Water requirements of urban landscape plants: a comparison of three factor-based approaches, *Ecol. Eng.*, 57, 276–284, <https://doi.org/10.1016/j.ecoleng.2013.04.025>, 2013.
- Pannkuk, T. R., White, R. H., Steinke, K., Aitkenhead-Peterson, J. A., Chalmers, D. R., and Thomas, J. C.: Landscape coefficients for single- and mixed-species landscapes, *HortScience*, 45, 1529–1533, 615 <https://doi.org/10.21273/HORTSCI.45.10.1529>, 2010.
- Pennsylvania Department of Transportation: Traffic volume maps, available at: <https://www.penndot.pa.gov/ProjectAndPrograms/Planning/Maps/Pages/Traffic-Volume.aspx>, last access: 22 June 2022, 2022.
- Pope, G. G., Toran, L., Caplan, J. S., and Nyquist, J.: Spatiotemporal dynamics of road salt in a highway bioswale: a 620 comparison of point and continuous monitoring methods, *Water Air Soil Pollut.*, 236, 654, <https://doi.org/10.1007/s11270-025-08281-8>, 2025.
- Scharenbroch, B. C., Morgenroth, J., and Maule, B.: Tree species suitability to bioswales and impact on the urban water budget, *J. Environ. Qual.*, 45, 199–206, <https://doi.org/10.2134/jeq2015.01.0060>, 2016.
- Shuttleworth, W. J.: Putting the “vap” into evaporation, *Hydrol. Earth Syst. Sci.*, 11, 210–244, [https://doi.org/10.5194/hess-](https://doi.org/10.5194/hess-11-210-2007) 625 [11-210-2007](https://doi.org/10.5194/hess-11-210-2007), 2007.

Shuttleworth, W. J. and Wallace, J. S.: Calculating the water requirements of irrigated crops in Australia using the Matt–  
Shuttleworth approach, *Trans. ASABE*, 52, 1895–1906, <https://doi.org/10.13031/2013.29217>, 2009.

630 Skorobogatov, A., He, J., Chu, A., Valeo, C., and van Duin, B.: The impact of media, plants and their interactions on  
bioretention performance: a review, *Sci. Total Environ.*, 715, 136918, <https://doi.org/10.1016/j.scitotenv.2020.136918>,  
2020.

Steduto, P. and Hsiao, T. C.: Maize canopies under two soil water regimes: II. Seasonal trends of evapotranspiration, carbon  
dioxide assimilation and canopy conductance, and as related to leaf area index, *Agric. For. Meteorol.*, 89, 185–200,  
[https://doi.org/10.1016/S0168-1923\(97\)00084-1](https://doi.org/10.1016/S0168-1923(97)00084-1), 1998.

635 Sun, H., Kopp, K., and Kjølgren, R.: Water-efficient urban landscapes: integrating different water use categorizations and  
plant types, *HortScience*, 47, 254–263, <https://doi.org/10.21273/HORTSCI.47.2.254>, 2012.

Toran, L., Eisenman, S., Caplan, J., van Aken, B., McKenzie, E., Nyquist, J., Ryan, R., Traver, R., Tu, M.-C., Schmidt, N.,  
and Calt, E.: Stormwater control management and monitoring, report prepared for the Pennsylvania Department of  
Transportation, 2017.

640 Traver, R. G. and Ebrahimian, A.: Dynamic design of green stormwater infrastructure, *Front. Environ. Sci. Eng.*, 11, 15,  
<https://doi.org/10.1007/s11783-017-0973-z>, 2017.

Wadzuk, B. M., Hickman, J. M., and Traver, R. G.: Understanding the role of evapotranspiration in bioretention: mesocosm  
study, *J. Sustain. Water Built Environ.*, 1, 04014002, <https://doi.org/10.1061/JSWBAY.0000794>, 2015.

645 Wagner, W. and Pruss, A.: International equations for the saturation properties of ordinary water substance. Revised  
according to the international temperature scale of 1990, *J. Phys. Chem. Ref. Data*, 22, 783–787,  
<https://doi.org/10.1063/1.555926>, 1993.

Xue, Y., Zhang, Z., Li, X., Liang, H., and Yin, L.: A review of evapotranspiration estimation models: advances and future  
development, *Water Resour. Manage.*, 39, 3641–3657, <https://doi.org/10.1007/s11269-025-04191-w>, 2025.

650 Zhang, K. and Parolari, A. J.: Impact of stormwater infiltration on rainfall-derived inflow and infiltration: a physically based  
surface–subsurface urban hydrologic model, *J. Hydrol.*, 610, 127938, <https://doi.org/10.1016/j.jhydrol.2022.127938>,  
2022.
